# Supplementary material
Source: PubMed Central journal article supplement (PMC4570572)
Supplement: NIHMS371681-supplement-01.pdf [file NIHMS371681-supplement-01.pdf]

Supplemental Table 1

Ascorbic acid in reduced and non-reduced RBC samples

| <b>Mouse #</b> | <b>RBC-ascorbate<br/>without TCEP (<math>\mu\text{M}</math>)</b> | <b>RBC-ascorbate<br/>with TCEP (<math>\mu\text{M}</math>)</b> |
|----------------|------------------------------------------------------------------|---------------------------------------------------------------|
| <b>1</b>       | 24.0 $\pm$ 0.5                                                   | 25.2 $\pm$ 0.7                                                |
| <b>2</b>       | 25.4 $\pm$ 0.9                                                   | 23.4 $\pm$ 0.7                                                |
| <b>3</b>       | 21.2 $\pm$ 0.7                                                   | 22.5 $\pm$ 0.7                                                |
| <b>4</b>       | 21.5 $\pm$ 0.8                                                   | 20.4 $\pm$ 0.9                                                |
| <b>5</b>       | 22.5 $\pm$ 0.7                                                   | 22.8 $\pm$ 1.1                                                |
| <b>6</b>       | 22.5 $\pm$ 1.0                                                   | 21.6 $\pm$ 1.0                                                |

Data are displayed in Supplemental Figure 1

10% RBC lysates from C57/BL6 wild type mice were measured with/without 20 fold excess tris (2-carboxyethyl) phosphine (TCEP).

Supplemental table 2

Recovery of dehydroascorbic acid (DHA) spiked in PBS containing 10% RBCs

| <b>Type of<br/>RBC</b>     | <b>Added DHA<br/>(<math>\mu\text{M}</math>)</b> | <b>Measured after<br/>addition (<math>\mu\text{M}</math>)</b> | <b>Recovery<br/>(%)</b> |
|----------------------------|-------------------------------------------------|---------------------------------------------------------------|-------------------------|
| <b>C57<br/>(gulo -/-)</b>  | 2                                               | 1.7 $\pm$ 0.1                                                 | 87.2 $\pm$ 0.1          |
|                            | 5                                               | 4.7 $\pm$ 0.5                                                 | 94.8 $\pm$ 0.1          |
|                            | 10                                              | 9.0 $\pm$ 0.3                                                 | 89.9 $\pm$ 0.0          |
| <b>C57<br/>(wild type)</b> | 2                                               | 1.6 $\pm$ 0.0                                                 | 80.5 $\pm$ 0.0          |
|                            | 5                                               | 4.6 $\pm$ 0.2                                                 | 92.6 $\pm$ 0.0          |
|                            | 10                                              | 8.5 $\pm$ 0.1                                                 | 85.3 $\pm$ 0.0          |

20  $\mu\text{l}$ , 50  $\mu\text{l}$ , or 100  $\mu\text{l}$  dehydroascorbic acid (0.1 mM) was added to 1ml PBS containing 10% RBCs. Immediately after addition, the mixture was centrifuged at 1000 x g for 2 minutes and supernatant was withdrawn. 50  $\mu\text{l}$  1mM TCEP was added to 50  $\mu\text{l}$  supernatant, the mixture was vortexed, 100  $\mu\text{l}$  90% Methanol/EDTA was added, the solution centrifuged at 25,000 x g for 10 min., and the supernatant analyzed by HPLC.

## Supplemental Figure 1

### **Dehydroascorbic acid in RBCs.**

After blood from wildtype mice (n=6) was isolated and washed three times, 40  $\mu$ l packed RBCs were lysed either with 160  $\mu$ l water or 140  $\mu$ l water + 20  $\mu$ l 0.5 mM tris(2-carboxyethyl)phosphine (TCEP). Samples were processed by centrifugal ultrafiltration and analyzed as described in Methods. Dehydroascorbic acid is the difference between non-reduced and tris (2-carboxyethyl)phosphine-reduced samples.
